# Supplementary material
Source: MDPI journal article supplement (https://www.mdpi.com/2073-4344/8/2/50)
Supplement: s1 [file s1]

Supporting Information

Vine shoots and grape stalks as carbon sources for hydrogen evolution reaction electrocatalyst supports

J.A.S.B. Cardoso, B. Šljukić, M. Erdem, C.A.C. Sequeira and D.M.F. Santos

The complete cathodic polarisation data as a function of temperature used for evaluation of the HER activity at each of the three tested electrodes is presented in Figure S1.


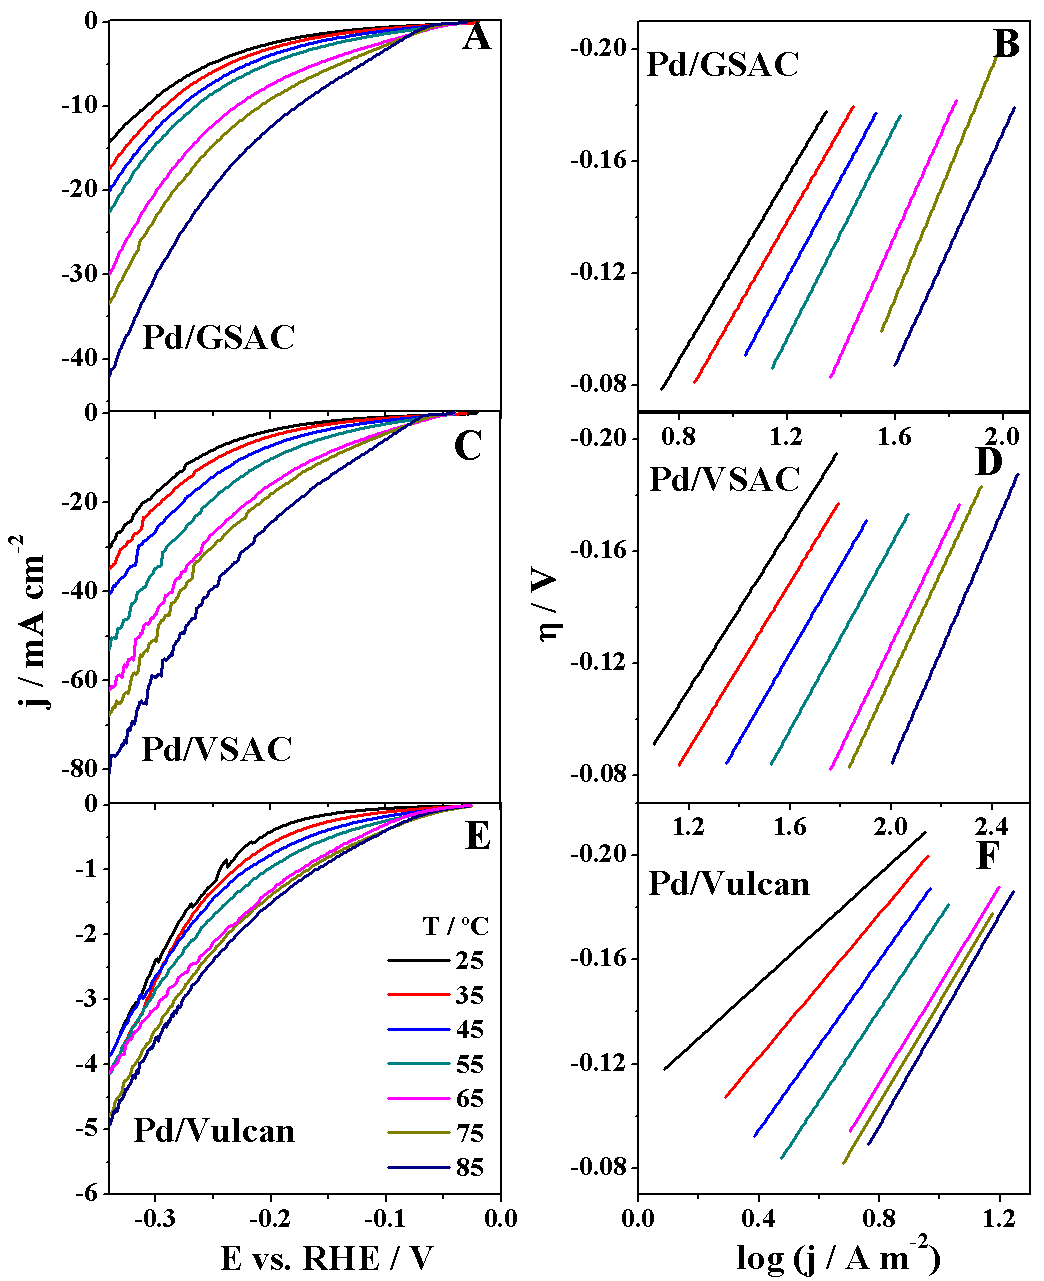


**Figure S1.** Polarisation curves recorded at scan rate of 1 mV s-1 in 8 M KOH solution at different temperatures (25–85 ℃) and the corresponding Tafel plots for Pd/GSAC (A,B), Pd/VSAC (C,D) and Pd/Vulcan (E,F).

© 2017 by the authors. Submitted for possible open access publication under the
terms and conditions of the Creative Commons Attribution (CC BY) license (http://creativecommons.org/licenses/by/4.0/).
